# Supplementary material for: Substituent enhanced fluorescence properties of star α-cyanostilbenes and their application in bioimaging
Source: Royal Society of Chemistry journal article supplement (doi:10.1039/c9tb01452g), 2019-01-01
Supplement: c9tb01452g1.pdf [file c9tb01452g1.pdf]

## Substituent enhanced fluorescence properties of star $\alpha$ -cyanostilbenes and its application in bioimaging

A. Gopinath<sup>a</sup>, N. Manivannan<sup>b</sup>, Sudip Mandal<sup>c</sup>, N. Mathivanan<sup>b</sup> and A. Sultan Nasar<sup>\*a</sup>

<sup>a</sup>Department of Polymer Science, University of Madras, Guindy Campus, Chennai-25, India.

<sup>b</sup>Biocontrol and Microbial Metabolites Lab, Centre for Advanced Studies in Botany, University of Madras, Guindy Campus, Chennai-25, India.

<sup>c</sup>Department of Chemistry, Indian Institute of Technology Madras, Chennai-600 036, India.

\*Corresponding author E-mail: [drasultannasar@unom.ac.in](mailto:drasultannasar@unom.ac.in)

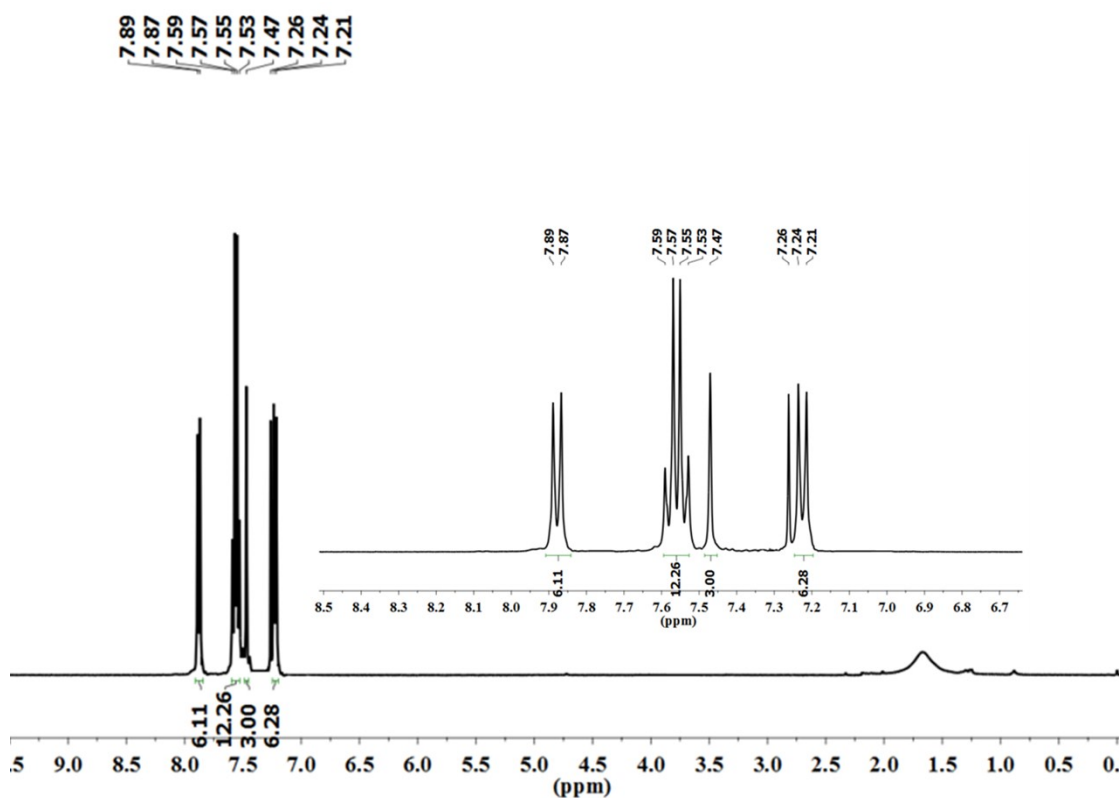

Figure S1. <sup>1</sup>H NMR (300 MHz) spectrum of star NTBTBPA in CDCl<sub>3</sub>.

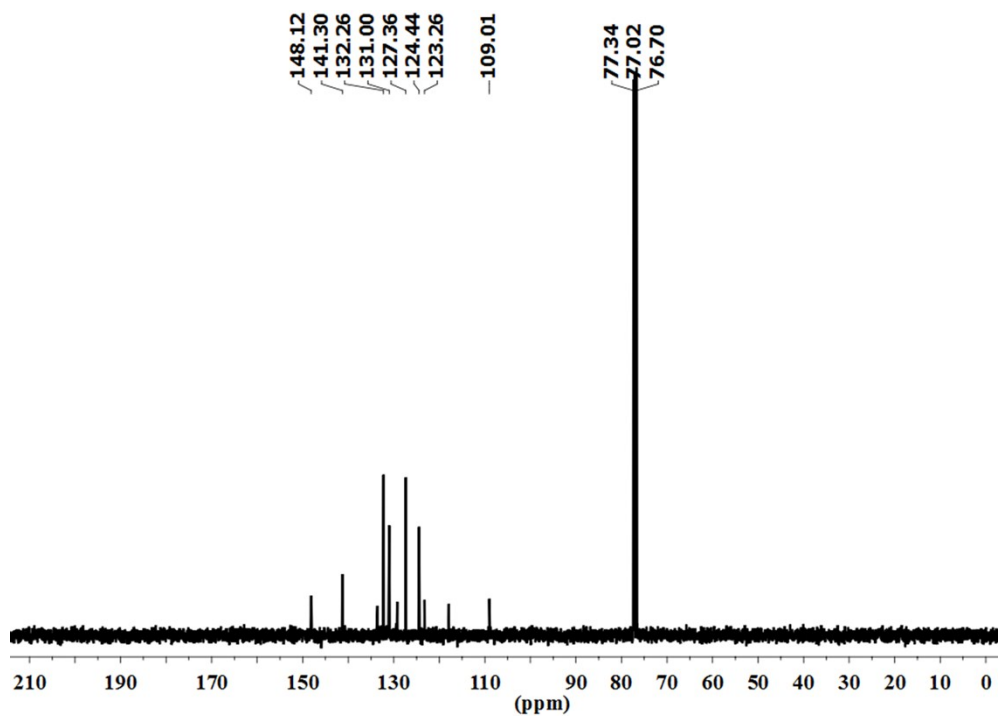

Figure S2.  $^{13}\text{C}$  NMR (300 MHz) spectrum of star NTBTBPA in  $\text{CDCl}_3$ .

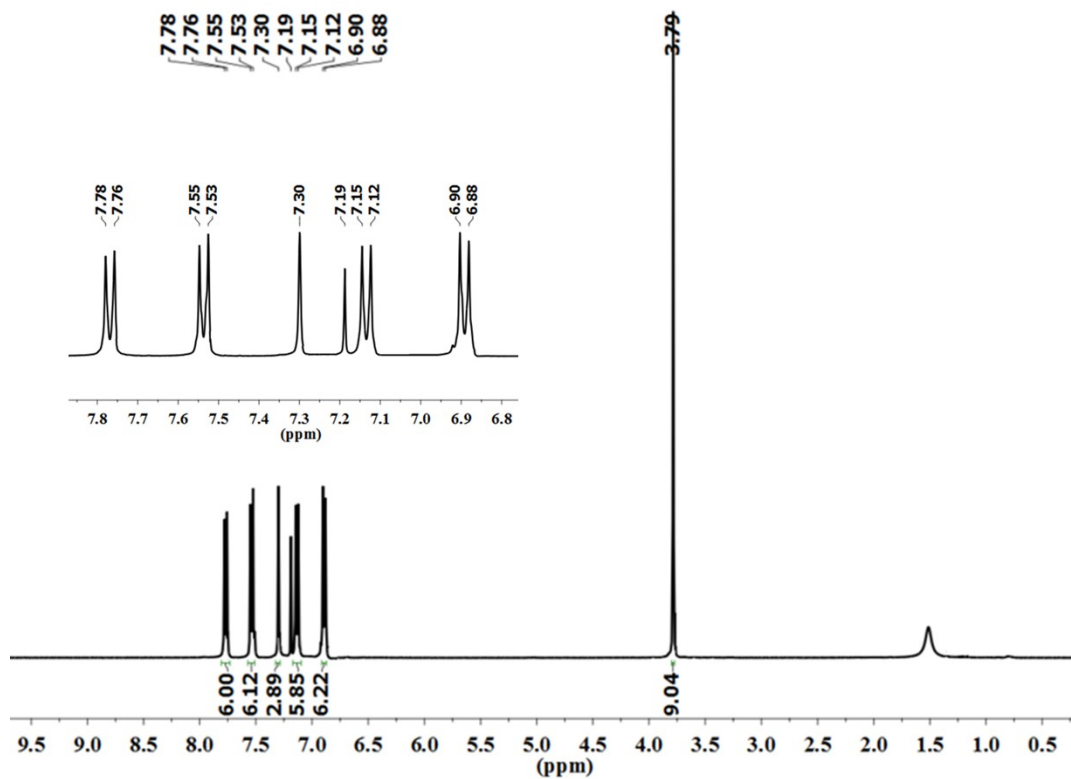

Figure S3.  $^1\text{H}$  NMR (300 MHz) spectrum of star NTBTMPA in  $\text{CDCl}_3$ .

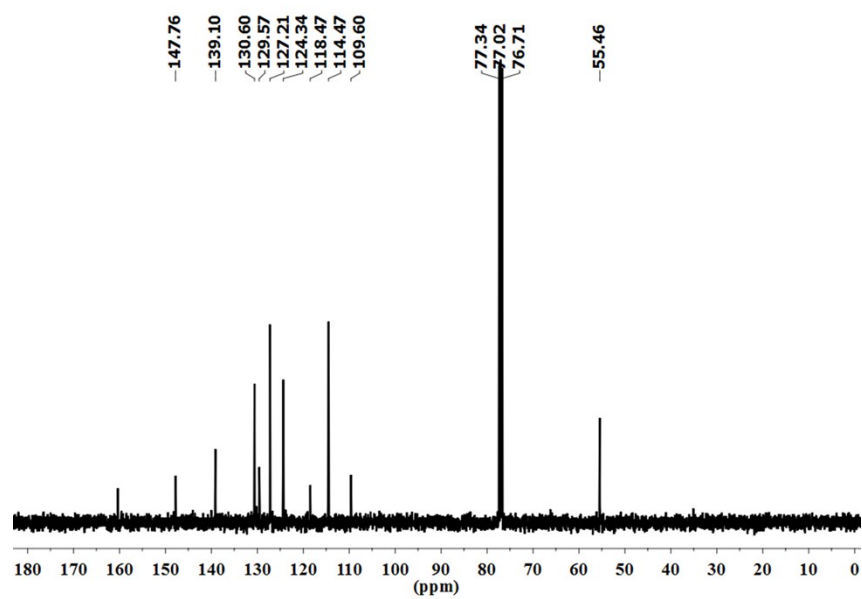

Figure S4.  $^{13}\text{C}$  NMR (300 MHz) spectrum of star NTBTMPA in  $\text{CDCl}_3$ .

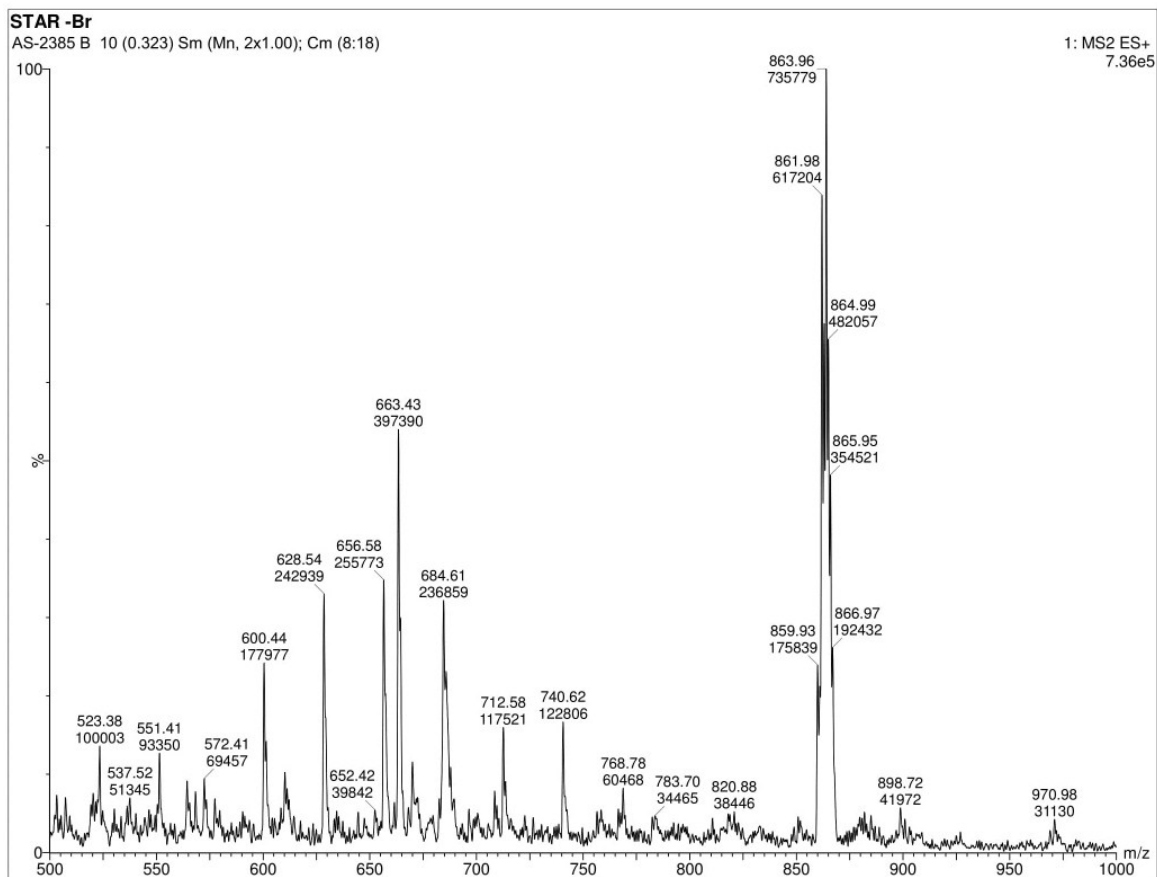

Figure S5. ESI Mass spectrum of of star NTBTBPA, Calculated molecular Weight = 859.97  
Mass obtained in positive mode = 859.93.

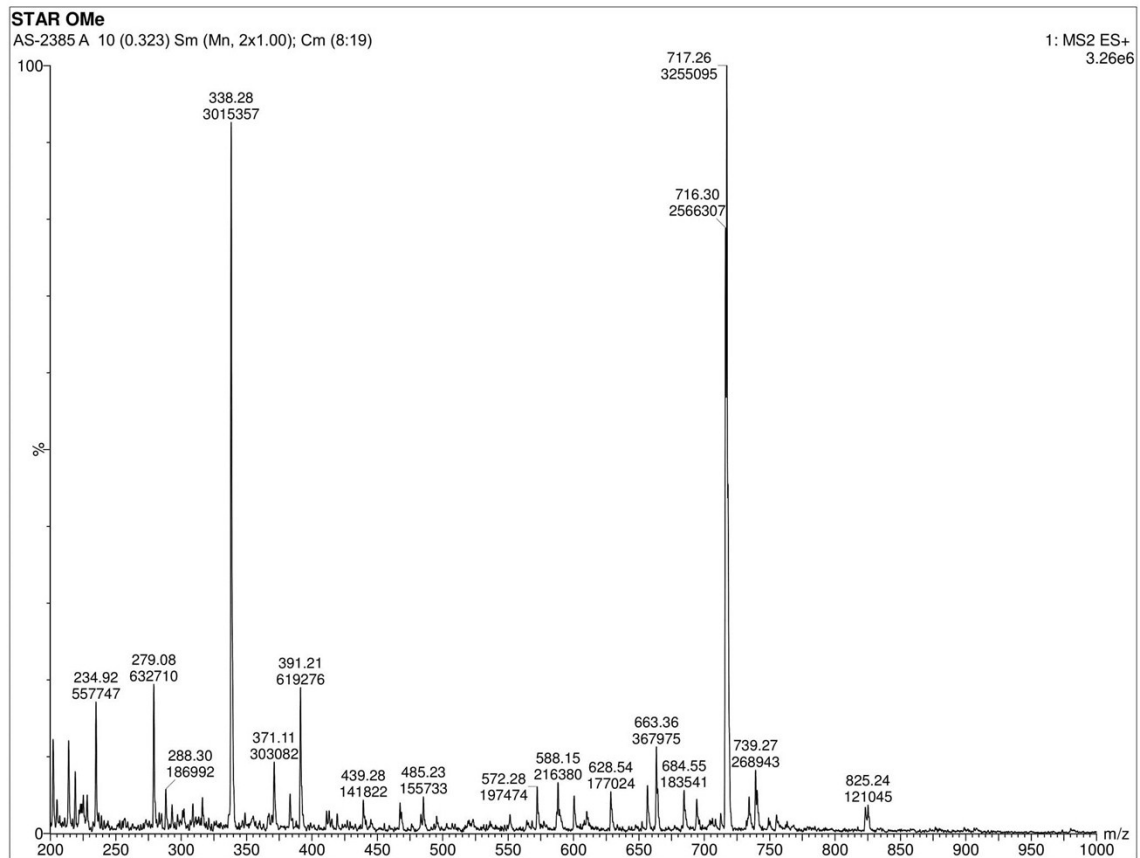

Figure S6. ESI Mass spectrum of of star NTBTMPA, Calculated molecular Weight = 716.27  
Mass obtained in positive mode = 716.30.

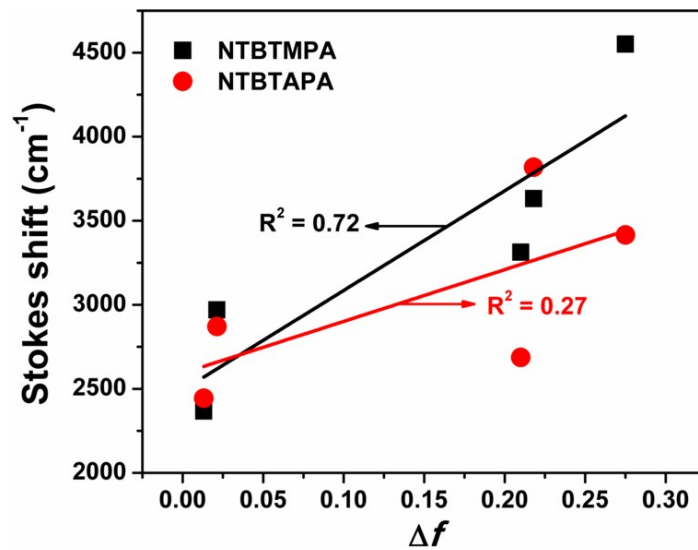

Figure S7 the Lippert-Mataga plot of the fluorescent star molecules NTBTMPA and NTBTAPA.
